# Supplementary material for: An Analytical Method to Estimate Supersaturation in Gas–Liquid Systems as a Function of Pressure-Reduction Step and Waiting Time
Source: MDPI journal article supplement (doi:10.3390/eng3010010), 2022-02-21
Supplement: s1 [file s1]

Supplementary Material for

**An analytical Method to Estimate Supersaturation in Gas-liquid  
Systems as a Function of Pressure-reduction Step and Waiting Time**

Sushobhan Pradhan, Prem Bikkina\*

School of Chemical Engineering, Oklahoma State University, Stillwater, OK 74078, USA

\*Corresponding Author

Phone: +1-405-744-9112. Fax: +1-405-744-6338. Email: [prem.bikkina@okstate.edu](mailto:prem.bikkina@okstate.edu)

## Derivation of Supersaturation Equation

The Fick's second law of diffusion given below describes the one-dimensional diffusion equation for binary mixtures of species A and B under transient condition [14, 15]:

$$\frac{\partial C}{\partial t} = D_{AB} \frac{\partial^2 C}{\partial x^2} \quad (S1)$$

where  $D_{AB}$  is the diffusion coefficient of species A (gas) in species B (liquid),  $C$  is the solute concentration,  $t$  is the time, and  $x$  is the position.

$y = f(x, t)$  defined by the following dimensionless characteristic equation:

$$y = \frac{x}{2\sqrt{D_{AB}t}} \quad (S2)$$

$$\frac{\partial y}{\partial x} = \frac{1}{2\sqrt{D_{AB}t}}, \quad \text{and} \quad \frac{\partial y}{\partial t} = \frac{-x}{4\sqrt{D_{AB}t^3}} \quad (S3)$$

$$\frac{\partial C}{\partial t} = \frac{\partial C}{\partial y} \times \frac{\partial y}{\partial t} \quad (S4)$$

From Equations (S3) and (S4):

$$\frac{\partial C}{\partial t} = \frac{-x}{4\sqrt{D_{AB}t^3}} \times \frac{\partial C}{\partial y} \quad (S5)$$

The  $\frac{\partial^2 C}{\partial x^2}$  from Equation (S1) is determined by the following steps:

$$\frac{\partial^2 C}{\partial x^2} = \frac{\partial}{\partial x} \left( \frac{\partial C}{\partial x} \right) = \frac{\partial}{\partial x} \left[ \frac{\partial C}{\partial y} \times \left( \frac{\partial y}{\partial x} \right) \right] = \frac{\partial}{\partial x} \left[ \frac{\partial C}{\partial y} \times \frac{1}{2\sqrt{D_{AB}t}} \right] \quad (S6)$$

$$\text{Assuming } \frac{\partial C}{\partial y} \times \frac{1}{2\sqrt{D_{AB}t}} = m \quad (S7)$$

$$\text{Therefore, } \frac{\partial^2 C}{\partial x^2} = \frac{\partial m}{\partial x} \quad (S8)$$

$$\text{Also, } \frac{\partial m}{\partial x} = \frac{\partial m}{\partial y} \times \frac{\partial y}{\partial x} \quad (\text{S9})$$

$$\text{Now, } \frac{\partial m}{\partial y} = \left[ \frac{\partial}{\partial y} \left\{ \frac{\partial C}{\partial y} \times \frac{1}{2\sqrt{D_{AB}t}} \right\} \right] = \frac{1}{2\sqrt{D_{AB}t}} \times \frac{\partial^2 C}{\partial y^2} \quad (\text{S10})$$

$$\text{From Eqn. (S3), } \frac{\partial y}{\partial x} = \frac{1}{2\sqrt{D_{AB}t}} \quad (\text{S11})$$

From Equations (S9)–(S11), we get:

$$\frac{\partial m}{\partial x} = \frac{\partial m}{\partial y} \times \frac{\partial y}{\partial x} = \left( \frac{1}{2\sqrt{D_{AB}t}} \times \frac{\partial^2 C}{\partial y^2} \right) \left( \frac{1}{2\sqrt{D_{AB}t}} \right) = \frac{1}{4D_{AB}t} \times \frac{\partial^2 C}{\partial y^2}$$

From eqn. (S8):

$$\frac{\partial^2 C}{\partial x^2} = \frac{\partial m}{\partial x} = \frac{\partial}{\partial x} \left[ \frac{\partial C}{\partial y} \left( \frac{\partial y}{\partial x} \right) \right] = \frac{1}{4D_{AB}t} \times \frac{\partial^2 C}{\partial y^2} \quad (\text{S12})$$

Substituting eqns. (S5) & (S12) in eqn. (S1) gives:

$$\begin{aligned} \frac{-x}{4\sqrt{D_{AB}t^3}} \times \frac{\partial C}{\partial y} &= D_{AB} \times \frac{1}{4D_{AB}t} \times \frac{\partial^2 C}{\partial y^2} \\ \frac{\partial C}{\partial y} &= \frac{-\sqrt{D_{AB}t}}{x} \times \frac{\partial^2 C}{\partial y^2} \end{aligned} \quad (\text{S13})$$

From eqn. (S2), we have:

$$\begin{aligned} y &= \frac{x}{2\sqrt{D_{AB}t}} \\ \frac{\partial C}{\partial y} &= \frac{-1}{2y} \times \frac{\partial^2 C}{\partial y^2} \end{aligned} \quad (\text{S14})$$

$$\text{Let us assume: } n = \frac{\partial C}{\partial y} \quad (\text{S15})$$

Putting eqn. (S15) in eqn. (S14):

$$n = \frac{-1}{2y} \times \frac{\partial n}{\partial y}$$

$$-2 \int y dy = \int \frac{1}{n} dn$$

$-y^2 = \ln n - \ln A$ , where A is an integration constant

$$n = A \exp (-y^2) \quad (S16)$$

Applying eqn. (S15) in eqn. (S16):

$$\frac{dC}{dy} = A \exp (-y^2)$$

$$dC = A \exp (-y^2) dy \quad (S17)$$

The boundary conditions to solve the integral are given by:

$$C_A = C_{Aeq} \text{ at } y = 0 \text{ (i.e., } x = 0)$$

$$C_A = C_{AS} \text{ at } y = \infty \text{ (i.e., } t = 0)$$

Integrating eqn. (S17) and applying the above boundary conditions will get:

$$\int_{C_{Aeq}}^{C_{AS}} dC = A \int_0^\infty \exp (-y^2) dy \quad (S18)$$

$$C_{AS} - C_{Aeq} = A \int_0^\infty \exp (-y^2) dy \quad (S19)$$

From the Gaussian integral [16], we have

$$\int_0^\infty \exp (-y^2) dy = \frac{\sqrt{\pi}}{2} \quad (S20)$$

From eqns. (S19) and (S20):

$$A = \frac{2}{\sqrt{\pi}} \times (C_{AS} - C_{Aeq}) \quad (S21)$$

The following error function and the boundary conditions were used to solve Fick's second law of diffusion [14]:

$$\text{erf}(y) = \frac{2}{\sqrt{\pi}} \int_0^y \exp(-y^2) dy \quad (\text{S22})$$

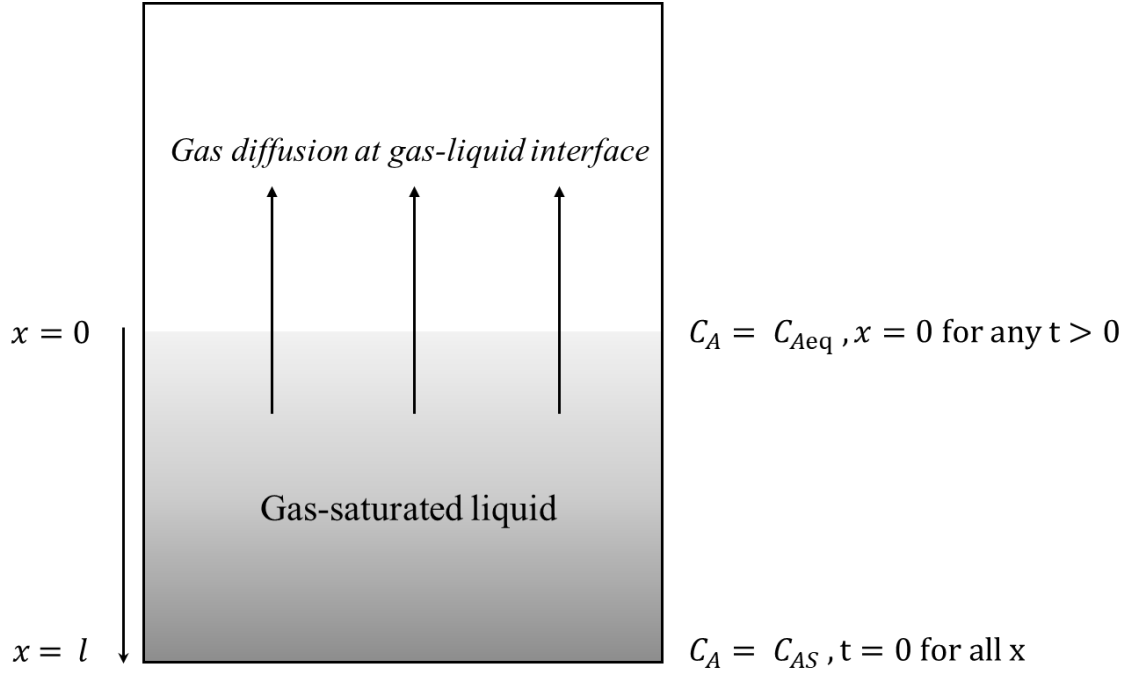

**Figure S1:** Schematic of bubble nucleation system used to study gas diffusion and saturation in a liquid

The boundary conditions for the gas-liquid system shown in Figure 1 are given below:

$$C_A = C_{Aeq}, \text{ at } x = 0 \text{ and for any } t$$

$$C_A = C_{AS}, \text{ at } t = 0 \text{ and for all } x$$

where,  $C_{AS}$  is the saturated gas concentration in mol/l (after complete saturation),  $C_A$  is the gas concentration after any time  $t$ ,  $C_{Aeq}$  is the gas concentration at the gas-liquid interface at equilibrium (with the current gas pressure) in mol/l. As mentioned earlier,  $y = f(x, t)$ ; therefore it is required to redefine  $x$  and  $y$  in Figure S1. In Figure S1,  $x$  is an independent variable and it is a position in the liquid column, which is taken as 5 mm (total height of the liquid column) for estimating  $C_A$  in Tables S2 to S3 and S2 to S5.  $y$  is a dependent variable that varies with position in the liquid column, and waiting time after each pressure reduction step.

From Equation (S18), we have:  $dC = A \exp(-y^2) dy$

Integrating the above equation and applying the boundary conditions, we get the following:

$$\int_{C_{Aeq}}^{C_A} dC = A \int_0^y \exp(-y^2) dy \quad (S23)$$

Applying Equations (S20) and (S21) in Equation (S19):

$$C_A - C_{Aeq} = \frac{2}{\sqrt{\pi}} \times (C_{AS} - C_{Aeq}) \times \frac{\sqrt{\pi}}{2} \times \text{erf}(y)$$

$$\frac{C_A - C_{Aeq}}{C_{AS} - C_{Aeq}} = \text{erf}\left(\frac{x}{2\sqrt{D_{AB}t}}\right) \quad (S24)$$

Equation (S24) is the solution to the problem for time-dependent diffusion assuming semi-infinite system.

For a given  $x$ ,  $D_{AB}$ , and  $t$ , assuming  $\text{erf}\left(\frac{x}{2\sqrt{D_{AB}t}}\right)$  as  $\eta$ , Equation (S24) reduces to:

$$\frac{C_A - C_{Aeq}}{C_{AS} - C_{Aeq}} = \eta \quad (S25)$$

**Table S1:** Saturation time calculations for carbon dioxide, methane and nitrogen gases in water

| Type of gas    | $\tau$ | $D$ (mm <sup>2</sup> /sec) | $l$ (mm) | $t$ (sec)       |
|----------------|--------|----------------------------|----------|-----------------|
| Carbon dioxide | 4      | 0.0016                     | 5        | 62,500 (17.4 h) |
| Methane        | 4      | 0.00177                    | 5        | 56,497 (15.7 h) |
| Nitrogen       | 4      | 0.00189                    | 5        | 52,910 (14.7 h) |

**Table S2.** Supersaturation and diffusion calculations for carbon dioxide with 500 mbar (50000 Pa) step-down pressure

| Pressure (Pa) | Equilibrium Concentration<br>( $C_{Aeq}$ )<br>(mol/l) | Supersaturation<br>( $C_{AS} - C_{Aeq}$ )<br>(mol/l) | Gas concentration<br>( $C_A$ )<br>(mol/l) | Amount of gas diffused<br>( $\Delta C$ )<br>(mol/l) |
|---------------|-------------------------------------------------------|------------------------------------------------------|-------------------------------------------|-----------------------------------------------------|
| 600,000       | 0.20133                                               |                                                      | 0.20133                                   |                                                     |
| 550,000       | 0.18455                                               | 0.01678                                              | 0.20128                                   | 0.00005                                             |
| 500,000       | 0.16778                                               | 0.03350                                              | 0.20117                                   | 0.00011                                             |
| 450,000       | 0.15100                                               | 0.05017                                              | 0.20101                                   | 0.00016                                             |
| 400,000       | 0.13422                                               | 0.06679                                              | 0.20079                                   | 0.00021                                             |
| 350,000       | 0.11744                                               | 0.08335                                              | 0.20053                                   | 0.00027                                             |
| 300,000       | 0.10067                                               | 0.09986                                              | 0.20021                                   | 0.00032                                             |
| 250,000       | 0.08389                                               | 0.11632                                              | 0.19983                                   | 0.00037                                             |
| 200,000       | 0.06711                                               | 0.13272                                              | 0.19940                                   | 0.00043                                             |
| 150,000       | 0.05033                                               | 0.14907                                              | 0.19892                                   | 0.00048                                             |
| 100,000       | 0.03356                                               | 0.16537                                              | 0.19839                                   | 0.00053                                             |
| 50,000        | 0.01678                                               | 0.18162                                              | 0.19781                                   | 0.00058                                             |
| 0             | 0.00000                                               | 0.19781                                              | 0.19717                                   | 0.00064                                             |



**Table S3.** Supersaturation and diffusion calculations for carbon dioxide with 100 mbar (10000 Pa) step-down pressure

| Pressure<br>(Pa) | Equilibrium<br>Concentration<br>( $C_{Aeq}$ )<br>(mol/l) | Supersaturation<br>( $C_{AS} - C_{Aeq}$ )<br>(mol/l) | Gas<br>concentration<br>( $C_A$ )<br>(mol/l) | Amount<br>of gas<br>diffused<br>( $\Delta C$ )<br>(mol/l) |
|------------------|----------------------------------------------------------|------------------------------------------------------|----------------------------------------------|-----------------------------------------------------------|
| 600,000          | 0.20133                                                  |                                                      | 0.20133                                      |                                                           |
| 590,000          | 0.19798                                                  | 0.00336                                              | 0.20132                                      | 0.00001                                                   |
| 580,000          | 0.19462                                                  | 0.00670                                              | 0.20130                                      | 0.00002                                                   |
| 570,000          | 0.19127                                                  | 0.01003                                              | 0.20127                                      | 0.00003                                                   |
| 560,000          | 0.18791                                                  | 0.01336                                              | 0.20122                                      | 0.00004                                                   |
| 550,000          | 0.18455                                                  | 0.01667                                              | 0.20117                                      | 0.00005                                                   |
| 540,000          | 0.18120                                                  | 0.01997                                              | 0.20111                                      | 0.00006                                                   |
| 530,000          | 0.17784                                                  | 0.02326                                              | 0.20103                                      | 0.00007                                                   |
| 520,000          | 0.17449                                                  | 0.02654                                              | 0.20095                                      | 0.00009                                                   |
| 510,000          | 0.17113                                                  | 0.02981                                              | 0.20085                                      | 0.00010                                                   |
| 500,000          | 0.16778                                                  | 0.03307                                              | 0.20074                                      | 0.00011                                                   |
| 490,000          | 0.16442                                                  | 0.03632                                              | 0.20063                                      | 0.00012                                                   |
| 480,000          | 0.16107                                                  | 0.03956                                              | 0.20050                                      | 0.00013                                                   |
| 470,000          | 0.15771                                                  | 0.04279                                              | 0.20036                                      | 0.00014                                                   |
| 460,000          | 0.15435                                                  | 0.04601                                              | 0.20021                                      | 0.00015                                                   |
| 450,000          | 0.15100                                                  | 0.04922                                              | 0.20006                                      | 0.00016                                                   |
| 440,000          | 0.14764                                                  | 0.05241                                              | 0.19989                                      | 0.00017                                                   |
| 430,000          | 0.14429                                                  | 0.05560                                              | 0.19971                                      | 0.00018                                                   |

| <b>Pressure</b><br><b>(Pa)</b> | <b>Equilibrium</b><br><b>Concentration</b><br><b>(<math>C_{Aeq}</math>)</b><br><b>(mol/l)</b> | <b>Supersaturation</b><br><b>(<math>C_{AS} - C_{Aeq}</math>)</b><br><b>(mol/l)</b> | <b>Gas</b><br><b>concentration</b><br><b>(<math>C_A</math>)</b><br><b>(mol/l)</b> | <b>Amount</b><br><b>of gas</b><br><b>diffused</b><br><b>(<math>\Delta C</math>)</b><br><b>(mol/l)</b> |
|--------------------------------|-----------------------------------------------------------------------------------------------|------------------------------------------------------------------------------------|-----------------------------------------------------------------------------------|-------------------------------------------------------------------------------------------------------|
| 420,000                        | 0.14093                                                                                       | 0.05878                                                                            | 0.19952                                                                           | 0.00019                                                                                               |
| 410,000                        | 0.13758                                                                                       | 0.06194                                                                            | 0.19932                                                                           | 0.00020                                                                                               |
| 400,000                        | 0.13422                                                                                       | 0.06510                                                                            | 0.19911                                                                           | 0.00021                                                                                               |
| 390,000                        | 0.13087                                                                                       | 0.06825                                                                            | 0.19889                                                                           | 0.00022                                                                                               |
| 380,000                        | 0.12751                                                                                       | 0.07138                                                                            | 0.19866                                                                           | 0.00023                                                                                               |
| 370,000                        | 0.12415                                                                                       | 0.07451                                                                            | 0.19842                                                                           | 0.00024                                                                                               |
| 360,000                        | 0.12080                                                                                       | 0.07762                                                                            | 0.19817                                                                           | 0.00025                                                                                               |
| 350,000                        | 0.11744                                                                                       | 0.08073                                                                            | 0.19791                                                                           | 0.00026                                                                                               |
| 340,000                        | 0.11409                                                                                       | 0.08383                                                                            | 0.19764                                                                           | 0.00027                                                                                               |
| 330,000                        | 0.11073                                                                                       | 0.08691                                                                            | 0.19736                                                                           | 0.00028                                                                                               |
| 320,000                        | 0.10738                                                                                       | 0.08999                                                                            | 0.19707                                                                           | 0.00029                                                                                               |
| 310,000                        | 0.10402                                                                                       | 0.09305                                                                            | 0.19678                                                                           | 0.00030                                                                                               |
| 300,000                        | 0.10067                                                                                       | 0.09611                                                                            | 0.19647                                                                           | 0.00031                                                                                               |
| 290,000                        | 0.09731                                                                                       | 0.09916                                                                            | 0.19615                                                                           | 0.00032                                                                                               |
| 280,000                        | 0.09396                                                                                       | 0.10219                                                                            | 0.19582                                                                           | 0.00033                                                                                               |
| 270,000                        | 0.09060                                                                                       | 0.10522                                                                            | 0.19548                                                                           | 0.00034                                                                                               |
| 260,000                        | 0.08724                                                                                       | 0.10824                                                                            | 0.19513                                                                           | 0.00035                                                                                               |
| 250,000                        | 0.08389                                                                                       | 0.11124                                                                            | 0.19477                                                                           | 0.00036                                                                                               |
| 240,000                        | 0.08053                                                                                       | 0.11424                                                                            | 0.19441                                                                           | 0.00037                                                                                               |
| 230,000                        | 0.07718                                                                                       | 0.11723                                                                            | 0.19403                                                                           | 0.00038                                                                                               |

| <b>Pressure</b><br><b>(Pa)</b> | <b>Equilibrium</b><br><b>Concentration</b><br><b>(<math>C_{Aeq}</math>)</b><br><b>(mol/l)</b> | <b>Supersaturation</b><br><b>(<math>C_{AS} - C_{Aeq}</math>)</b><br><b>(mol/l)</b> | <b>Gas</b><br><b>concentration</b><br><b>(<math>C_A</math>)</b><br><b>(mol/l)</b> | <b>Amount</b><br><b>of gas</b><br><b>diffused</b><br><b>(<math>\Delta C</math>)</b><br><b>(mol/l)</b> |
|--------------------------------|-----------------------------------------------------------------------------------------------|------------------------------------------------------------------------------------|-----------------------------------------------------------------------------------|-------------------------------------------------------------------------------------------------------|
| 220,000                        | 0.07382                                                                                       | 0.12021                                                                            | 0.19364                                                                           | 0.00039                                                                                               |
| 210,000                        | 0.07047                                                                                       | 0.12318                                                                            | 0.19325                                                                           | 0.00040                                                                                               |
| 200,000                        | 0.06711                                                                                       | 0.12614                                                                            | 0.19284                                                                           | 0.00041                                                                                               |
| 190,000                        | 0.06376                                                                                       | 0.12909                                                                            | 0.19243                                                                           | 0.00042                                                                                               |
| 180,000                        | 0.06040                                                                                       | 0.13203                                                                            | 0.19200                                                                           | 0.00042                                                                                               |
| 170,000                        | 0.05704                                                                                       | 0.13496                                                                            | 0.19157                                                                           | 0.00043                                                                                               |
| 160,000                        | 0.05369                                                                                       | 0.13788                                                                            | 0.19112                                                                           | 0.00044                                                                                               |
| 150,000                        | 0.05033                                                                                       | 0.14079                                                                            | 0.19067                                                                           | 0.00045                                                                                               |
| 140,000                        | 0.04698                                                                                       | 0.14369                                                                            | 0.19021                                                                           | 0.00046                                                                                               |
| 130,000                        | 0.04362                                                                                       | 0.14659                                                                            | 0.18974                                                                           | 0.00047                                                                                               |
| 120,000                        | 0.04027                                                                                       | 0.14947                                                                            | 0.18926                                                                           | 0.00048                                                                                               |
| 110,000                        | 0.03691                                                                                       | 0.15235                                                                            | 0.18877                                                                           | 0.00049                                                                                               |
| 100,000                        | 0.03356                                                                                       | 0.15521                                                                            | 0.18827                                                                           | 0.00050                                                                                               |
| 90,000                         | 0.03020                                                                                       | 0.15807                                                                            | 0.18776                                                                           | 0.00051                                                                                               |
| 80,000                         | 0.02684                                                                                       | 0.16092                                                                            | 0.18724                                                                           | 0.00052                                                                                               |
| 70,000                         | 0.02349                                                                                       | 0.16375                                                                            | 0.18672                                                                           | 0.00053                                                                                               |
| 60,000                         | 0.02013                                                                                       | 0.16658                                                                            | 0.18618                                                                           | 0.00054                                                                                               |
| 50,000                         | 0.01678                                                                                       | 0.16940                                                                            | 0.18563                                                                           | 0.00054                                                                                               |
| 40,000                         | 0.01342                                                                                       | 0.17221                                                                            | 0.18508                                                                           | 0.00055                                                                                               |
| 30,000                         | 0.01007                                                                                       | 0.17501                                                                            | 0.18452                                                                           | 0.00056                                                                                               |

| <b>Pressure</b><br><b>(Pa)</b> | <b>Equilibrium</b><br><b>Concentration</b><br><b>(<math>C_{Aeq}</math>)</b><br><b>(mol/l)</b> | <b>Supersaturation</b><br><b>(<math>C_{AS} - C_{Aeq}</math>)</b><br><b>(mol/l)</b> | <b>Gas</b><br><b>concentration</b><br><b>(<math>C_A</math>)</b><br><b>(mol/l)</b> | <b>Amount</b><br><b>of gas</b><br><b>diffused</b><br><b>(<math>\Delta C</math>)</b><br><b>(mol/l)</b> |
|--------------------------------|-----------------------------------------------------------------------------------------------|------------------------------------------------------------------------------------|-----------------------------------------------------------------------------------|-------------------------------------------------------------------------------------------------------|
| 20,000                         | 0.00671                                                                                       | 0.17781                                                                            | 0.18395                                                                           | 0.00057                                                                                               |
| 10,000                         | 0.00336                                                                                       | 0.18059                                                                            | 0.18337                                                                           | 0.00058                                                                                               |
| 0                              | 0.00000                                                                                       | 0.18337                                                                            | 0.18278                                                                           | 0.00059                                                                                               |

**Table S4.** Supersaturation and diffusion calculations for methane gas with 500 mbar (50000 Pa) step-down pressure

| Pressure (Pa) | Equilibrium<br>Concentration<br>( $C_{Aeq}$ )<br>(mol/l) | Supersaturation<br>( $C_{AS} - C_{Aeq}$ )<br>(mol/l) | Gas<br>concentration<br>( $C_A$ )<br>(mol/l) | Amount of gas<br>diffused<br>( $\Delta C$ )<br>(mol/l) |
|---------------|----------------------------------------------------------|------------------------------------------------------|----------------------------------------------|--------------------------------------------------------|
| 600000        | 0.00817                                                  |                                                      | 0.00817                                      |                                                        |
| 550000        | 0.00749                                                  | 0.00068                                              | 0.00817                                      | 0.00000                                                |
| 500000        | 0.00681                                                  | 0.00136                                              | 0.00816                                      | 0.00001                                                |
| 450000        | 0.00613                                                  | 0.00203                                              | 0.00815                                      | 0.00001                                                |
| 400000        | 0.00545                                                  | 0.00270                                              | 0.00814                                      | 0.00001                                                |
| 350000        | 0.00477                                                  | 0.00337                                              | 0.00812                                      | 0.00002                                                |
| 300000        | 0.00409                                                  | 0.00403                                              | 0.00810                                      | 0.00002                                                |
| 250000        | 0.00340                                                  | 0.00469                                              | 0.00808                                      | 0.00002                                                |
| 200000        | 0.00272                                                  | 0.00535                                              | 0.00805                                      | 0.00003                                                |
| 150000        | 0.00204                                                  | 0.00601                                              | 0.00802                                      | 0.00003                                                |
| 100000        | 0.00136                                                  | 0.00666                                              | 0.00798                                      | 0.00003                                                |
| 50000         | 0.00068                                                  | 0.00730                                              | 0.00795                                      | 0.00004                                                |
| 0             | 0.00000                                                  | 0.00795                                              | 0.00791                                      | 0.00004                                                |

**Table S5.** Supersaturation and diffusion calculations for methane with 100 mbar (10000 Pa) step-down pressure

| Pressure<br>(Pa) | Equilibrium<br>Concentration<br>( $C_{Aeq}$ )<br>(mol/l) | Supersaturation<br>( $C_{AS} - C_{Aeq}$ )<br>(mol/l) | Gas<br>concentration<br>( $C_A$ )<br>(mol/l) | Amount of gas<br>diffused<br>( $\Delta C$ )<br>(mol/l) |
|------------------|----------------------------------------------------------|------------------------------------------------------|----------------------------------------------|--------------------------------------------------------|
| 600000           | 0.00817                                                  |                                                      | 0.00817                                      |                                                        |
| 590000           | 0.00804                                                  | 0.00014                                              | 0.00817                                      | 0.00000                                                |
| 580000           | 0.00790                                                  | 0.00027                                              | 0.00817                                      | 0.00000                                                |
| 570000           | 0.00776                                                  | 0.00041                                              | 0.00817                                      | 0.00000                                                |
| 560000           | 0.00763                                                  | 0.00054                                              | 0.00816                                      | 0.00000                                                |
| 550000           | 0.00749                                                  | 0.00067                                              | 0.00816                                      | 0.00000                                                |
| 540000           | 0.00735                                                  | 0.00081                                              | 0.00816                                      | 0.00000                                                |
| 530000           | 0.00722                                                  | 0.00094                                              | 0.00815                                      | 0.00000                                                |
| 520000           | 0.00708                                                  | 0.00107                                              | 0.00815                                      | 0.00001                                                |
| 510000           | 0.00695                                                  | 0.00120                                              | 0.00814                                      | 0.00001                                                |
| 500000           | 0.00681                                                  | 0.00133                                              | 0.00813                                      | 0.00001                                                |
| 490000           | 0.00667                                                  | 0.00146                                              | 0.00813                                      | 0.00001                                                |
| 480000           | 0.00654                                                  | 0.00159                                              | 0.00812                                      | 0.00001                                                |
| 470000           | 0.00640                                                  | 0.00172                                              | 0.00811                                      | 0.00001                                                |
| 460000           | 0.00626                                                  | 0.00184                                              | 0.00810                                      | 0.00001                                                |
| 450000           | 0.00613                                                  | 0.00197                                              | 0.00809                                      | 0.00001                                                |

| Pressure<br>(Pa) | Equilibrium<br>Concentration<br>( $C_{Aeq}$ )<br>(mol/l) | Supersaturation<br>( $C_{AS} - C_{Aeq}$ )<br>(mol/l) | Gas<br>concentration<br>( $C_A$ )<br>(mol/l) | Amount of gas<br>diffused<br>( $\Delta C$ )<br>(mol/l) |
|------------------|----------------------------------------------------------|------------------------------------------------------|----------------------------------------------|--------------------------------------------------------|
| 440000           | 0.00599                                                  | 0.00210                                              | 0.00808                                      | 0.00001                                                |
| 430000           | 0.00586                                                  | 0.00222                                              | 0.00807                                      | 0.00001                                                |
| 420000           | 0.00572                                                  | 0.00235                                              | 0.00806                                      | 0.00001                                                |
| 410000           | 0.00558                                                  | 0.00247                                              | 0.00804                                      | 0.00001                                                |
| 400000           | 0.00545                                                  | 0.00260                                              | 0.00803                                      | 0.00001                                                |
| 390000           | 0.00531                                                  | 0.00272                                              | 0.00802                                      | 0.00001                                                |
| 380000           | 0.00518                                                  | 0.00284                                              | 0.00800                                      | 0.00001                                                |
| 370000           | 0.00504                                                  | 0.00296                                              | 0.00799                                      | 0.00002                                                |
| 360000           | 0.00490                                                  | 0.00308                                              | 0.00797                                      | 0.00002                                                |
| 350000           | 0.00477                                                  | 0.00320                                              | 0.00796                                      | 0.00002                                                |
| 340000           | 0.00463                                                  | 0.00332                                              | 0.00794                                      | 0.00002                                                |
| 330000           | 0.00449                                                  | 0.00344                                              | 0.00792                                      | 0.00002                                                |
| 320000           | 0.00436                                                  | 0.00356                                              | 0.00790                                      | 0.00002                                                |
| 310000           | 0.00422                                                  | 0.00368                                              | 0.00788                                      | 0.00002                                                |
| 300000           | 0.00409                                                  | 0.00380                                              | 0.00786                                      | 0.00002                                                |
| 290000           | 0.00395                                                  | 0.00391                                              | 0.00784                                      | 0.00002                                                |
| 280000           | 0.00381                                                  | 0.00403                                              | 0.00782                                      | 0.00002                                                |
| 270000           | 0.00368                                                  | 0.00415                                              | 0.00780                                      | 0.00002                                                |

| Pressure<br>(Pa) | Equilibrium<br>Concentration<br>( $C_{Aeq}$ )<br>(mol/l) | Supersaturation<br>( $C_{AS} - C_{Aeq}$ )<br>(mol/l) | Gas<br>concentration<br>( $C_A$ )<br>(mol/l) | Amount of gas<br>diffused<br>( $\Delta C$ )<br>(mol/l) |
|------------------|----------------------------------------------------------|------------------------------------------------------|----------------------------------------------|--------------------------------------------------------|
| 260000           | 0.00354                                                  | 0.00426                                              | 0.00778                                      | 0.00002                                                |
| 250000           | 0.00340                                                  | 0.00438                                              | 0.00776                                      | 0.00002                                                |
| 240000           | 0.00327                                                  | 0.00449                                              | 0.00774                                      | 0.00002                                                |
| 230000           | 0.00313                                                  | 0.00460                                              | 0.00771                                      | 0.00002                                                |
| 220000           | 0.00300                                                  | 0.00472                                              | 0.00769                                      | 0.00002                                                |
| 210000           | 0.00286                                                  | 0.00483                                              | 0.00766                                      | 0.00002                                                |
| 200000           | 0.00272                                                  | 0.00494                                              | 0.00764                                      | 0.00003                                                |
| 190000           | 0.00259                                                  | 0.00505                                              | 0.00761                                      | 0.00003                                                |
| 180000           | 0.00245                                                  | 0.00516                                              | 0.00759                                      | 0.00003                                                |
| 170000           | 0.00232                                                  | 0.00527                                              | 0.00756                                      | 0.00003                                                |
| 160000           | 0.00218                                                  | 0.00538                                              | 0.00753                                      | 0.00003                                                |
| 150000           | 0.00204                                                  | 0.00549                                              | 0.00750                                      | 0.00003                                                |
| 140000           | 0.00191                                                  | 0.00560                                              | 0.00748                                      | 0.00003                                                |
| 130000           | 0.00177                                                  | 0.00571                                              | 0.00745                                      | 0.00003                                                |
| 120000           | 0.00163                                                  | 0.00581                                              | 0.00742                                      | 0.00003                                                |
| 110000           | 0.00150                                                  | 0.00592                                              | 0.00739                                      | 0.00003                                                |
| 100000           | 0.00136                                                  | 0.00603                                              | 0.00736                                      | 0.00003                                                |
| 90000            | 0.00123                                                  | 0.00613                                              | 0.00733                                      | 0.00003                                                |



| Pressure<br>(Pa) | Equilibrium<br>Concentration<br>( $C_{Aeq}$ )<br>(mol/l) | Supersaturation<br>( $C_{AS} - C_{Aeq}$ )<br>(mol/l) | Gas<br>concentration<br>( $C_A$ )<br>(mol/l) | Amount of gas<br>diffused<br>( $\Delta C$ )<br>(mol/l) |
|------------------|----------------------------------------------------------|------------------------------------------------------|----------------------------------------------|--------------------------------------------------------|
| 80000            | 0.00109                                                  | 0.00624                                              | 0.00729                                      | 0.00003                                                |
| 70000            | 0.00095                                                  | 0.00634                                              | 0.00726                                      | 0.00003                                                |
| 60000            | 0.00082                                                  | 0.00644                                              | 0.00723                                      | 0.00003                                                |
| 50000            | 0.00068                                                  | 0.00655                                              | 0.00720                                      | 0.00003                                                |
| 40000            | 0.00054                                                  | 0.00665                                              | 0.00716                                      | 0.00003                                                |
| 30000            | 0.00041                                                  | 0.00675                                              | 0.00713                                      | 0.00003                                                |
| 20000            | 0.00027                                                  | 0.00685                                              | 0.00709                                      | 0.00003                                                |
| 10000            | 0.00014                                                  | 0.00696                                              | 0.00706                                      | 0.00004                                                |
| 0                | 0.00000                                                  | 0.00706                                              | 0.00702                                      | 0.00004                                                |

**Table S6.** Supersaturation and diffusion calculations for nitrogen with 500 mbar (50000 Pa) step-down pressure

| Pressure (Pa) | Equilibrium<br>Concentration<br>( $C_{Aeq}$ )<br>(mol/l) | Supersaturation<br>( $C_{AS} - C_{Aeq}$ )<br>(mol/l) | Gas<br>concentration<br>( $C_A$ )<br>(mol/l) | Amount of gas<br>diffused<br>( $\Delta C$ )<br>(mol/l) |
|---------------|----------------------------------------------------------|------------------------------------------------------|----------------------------------------------|--------------------------------------------------------|
| 600000        | 0.00361                                                  |                                                      | 0.00361                                      |                                                        |
| 550000        | 0.00331                                                  | 0.00030                                              | 0.00361                                      | 0.00000                                                |
| 500000        | 0.00301                                                  | 0.00060                                              | 0.00361                                      | 0.00000                                                |
| 450000        | 0.00271                                                  | 0.00090                                              | 0.00360                                      | 0.00001                                                |
| 400000        | 0.00241                                                  | 0.00119                                              | 0.00359                                      | 0.00001                                                |
| 350000        | 0.00211                                                  | 0.00148                                              | 0.00358                                      | 0.00001                                                |
| 300000        | 0.00181                                                  | 0.00178                                              | 0.00357                                      | 0.00001                                                |
| 250000        | 0.00151                                                  | 0.00207                                              | 0.00356                                      | 0.00001                                                |
| 200000        | 0.00120                                                  | 0.00235                                              | 0.00354                                      | 0.00002                                                |
| 150000        | 0.00090                                                  | 0.00264                                              | 0.00352                                      | 0.00002                                                |
| 100000        | 0.00060                                                  | 0.00292                                              | 0.00350                                      | 0.00002                                                |
| 50000         | 0.00030                                                  | 0.00320                                              | 0.00348                                      | 0.00002                                                |
| 0             | 0.00000                                                  | 0.00348                                              | 0.00346                                      | 0.00002                                                |

**Table S7.** Supersaturation and diffusion calculations for nitrogen with 100 mbar (10000 Pa) step-down pressure

| Pressure<br>(Pa) | Equilibrium<br>Concentration<br>( $C_{Aeq}$ )<br>(mol/l) | Supersaturation<br>( $C_{AS} - C_{Aeq}$ )<br>(mol/l) | Gas<br>concentration<br>( $C_A$ )<br>(mol/l) | Amount of gas<br>diffused<br>( $\Delta C$ )<br>(mol/l) |
|------------------|----------------------------------------------------------|------------------------------------------------------|----------------------------------------------|--------------------------------------------------------|
| 600000           | 0.00361                                                  |                                                      | 0.00361                                      |                                                        |
| 590000           | 0.00355                                                  | 0.00006                                              | 0.00361                                      | 0.00000                                                |
| 580000           | 0.00349                                                  | 0.00012                                              | 0.00361                                      | 0.00000                                                |
| 570000           | 0.00343                                                  | 0.00018                                              | 0.00361                                      | 0.00000                                                |
| 560000           | 0.00337                                                  | 0.00024                                              | 0.00361                                      | 0.00000                                                |
| 550000           | 0.00331                                                  | 0.00030                                              | 0.00361                                      | 0.00000                                                |
| 540000           | 0.00325                                                  | 0.00036                                              | 0.00360                                      | 0.00000                                                |
| 530000           | 0.00319                                                  | 0.00041                                              | 0.00360                                      | 0.00000                                                |
| 520000           | 0.00313                                                  | 0.00047                                              | 0.00360                                      | 0.00000                                                |
| 510000           | 0.00307                                                  | 0.00053                                              | 0.00359                                      | 0.00000                                                |
| 500000           | 0.00301                                                  | 0.00058                                              | 0.00359                                      | 0.00000                                                |
| 490000           | 0.00295                                                  | 0.00064                                              | 0.00359                                      | 0.00000                                                |
| 480000           | 0.00289                                                  | 0.00070                                              | 0.00358                                      | 0.00000                                                |
| 470000           | 0.00283                                                  | 0.00075                                              | 0.00358                                      | 0.00001                                                |
| 460000           | 0.00277                                                  | 0.00081                                              | 0.00357                                      | 0.00001                                                |
| 450000           | 0.00271                                                  | 0.00086                                              | 0.00357                                      | 0.00001                                                |

| Pressure<br>(Pa) | Equilibrium<br>Concentration<br>( $C_{Aeq}$ )<br>(mol/l) | Supersaturation<br>( $C_{AS} - C_{Aeq}$ )<br>(mol/l) | Gas<br>concentration<br>( $C_A$ )<br>(mol/l) | Amount of gas<br>diffused<br>( $\Delta C$ )<br>(mol/l) |
|------------------|----------------------------------------------------------|------------------------------------------------------|----------------------------------------------|--------------------------------------------------------|
| 440000           | 0.00265                                                  | 0.00092                                              | 0.00356                                      | 0.00001                                                |
| 430000           | 0.00259                                                  | 0.00097                                              | 0.00355                                      | 0.00001                                                |
| 420000           | 0.00253                                                  | 0.00102                                              | 0.00355                                      | 0.00001                                                |
| 410000           | 0.00247                                                  | 0.00108                                              | 0.00354                                      | 0.00001                                                |
| 400000           | 0.00241                                                  | 0.00113                                              | 0.00353                                      | 0.00001                                                |
| 390000           | 0.00235                                                  | 0.00118                                              | 0.00352                                      | 0.00001                                                |
| 380000           | 0.00229                                                  | 0.00124                                              | 0.00351                                      | 0.00001                                                |
| 370000           | 0.00223                                                  | 0.00129                                              | 0.00351                                      | 0.00001                                                |
| 360000           | 0.00217                                                  | 0.00134                                              | 0.00350                                      | 0.00001                                                |
| 350000           | 0.00211                                                  | 0.00139                                              | 0.00349                                      | 0.00001                                                |
| 340000           | 0.00205                                                  | 0.00144                                              | 0.00348                                      | 0.00001                                                |
| 330000           | 0.00199                                                  | 0.00149                                              | 0.00347                                      | 0.00001                                                |
| 320000           | 0.00193                                                  | 0.00154                                              | 0.00346                                      | 0.00001                                                |
| 310000           | 0.00187                                                  | 0.00159                                              | 0.00345                                      | 0.00001                                                |
| 300000           | 0.00181                                                  | 0.00164                                              | 0.00344                                      | 0.00001                                                |
| 290000           | 0.00175                                                  | 0.00169                                              | 0.00342                                      | 0.00001                                                |
| 280000           | 0.00169                                                  | 0.00174                                              | 0.00341                                      | 0.00001                                                |
| 270000           | 0.00163                                                  | 0.00179                                              | 0.00340                                      | 0.00001                                                |

| Pressure<br>(Pa) | Equilibrium<br>Concentration<br>( $C_{Aeq}$ )<br>(mol/l) | Supersaturation<br>( $C_{AS} - C_{Aeq}$ )<br>(mol/l) | Gas<br>concentration<br>( $C_A$ )<br>(mol/l) | Amount of gas<br>diffused<br>( $\Delta C$ )<br>(mol/l) |
|------------------|----------------------------------------------------------|------------------------------------------------------|----------------------------------------------|--------------------------------------------------------|
| 260000           | 0.00157                                                  | 0.00184                                              | 0.00339                                      | 0.00001                                                |
| 250000           | 0.00151                                                  | 0.00188                                              | 0.00338                                      | 0.00001                                                |
| 240000           | 0.00144                                                  | 0.00193                                              | 0.00336                                      | 0.00001                                                |
| 230000           | 0.00138                                                  | 0.00198                                              | 0.00335                                      | 0.00001                                                |
| 220000           | 0.00132                                                  | 0.00203                                              | 0.00334                                      | 0.00001                                                |
| 210000           | 0.00126                                                  | 0.00207                                              | 0.00332                                      | 0.00001                                                |
| 200000           | 0.00120                                                  | 0.00212                                              | 0.00331                                      | 0.00001                                                |
| 190000           | 0.00114                                                  | 0.00216                                              | 0.00329                                      | 0.00001                                                |
| 180000           | 0.00108                                                  | 0.00221                                              | 0.00328                                      | 0.00001                                                |
| 170000           | 0.00102                                                  | 0.00226                                              | 0.00326                                      | 0.00002                                                |
| 160000           | 0.00096                                                  | 0.00230                                              | 0.00325                                      | 0.00002                                                |
| 150000           | 0.00090                                                  | 0.00235                                              | 0.00323                                      | 0.00002                                                |
| 140000           | 0.00084                                                  | 0.00239                                              | 0.00322                                      | 0.00002                                                |
| 130000           | 0.00078                                                  | 0.00243                                              | 0.00320                                      | 0.00002                                                |
| 120000           | 0.00072                                                  | 0.00248                                              | 0.00318                                      | 0.00002                                                |
| 110000           | 0.00066                                                  | 0.00252                                              | 0.00317                                      | 0.00002                                                |
| 100000           | 0.00060                                                  | 0.00256                                              | 0.00315                                      | 0.00002                                                |
| 90000            | 0.00054                                                  | 0.00261                                              | 0.00313                                      | 0.00002                                                |

| Pressure<br>(Pa) | Equilibrium<br>Concentration<br>( $C_{Aeq}$ )<br>(mol/l) | Supersaturation<br>( $C_{AS} - C_{Aeq}$ )<br>(mol/l) | Gas<br>concentration<br>( $C_A$ )<br>(mol/l) | Amount of gas<br>diffused<br>( $\Delta C$ )<br>(mol/l) |
|------------------|----------------------------------------------------------|------------------------------------------------------|----------------------------------------------|--------------------------------------------------------|
| 80000            | 0.00048                                                  | 0.00265                                              | 0.00311                                      | 0.00002                                                |
| 70000            | 0.00042                                                  | 0.00269                                              | 0.00310                                      | 0.00002                                                |
| 60000            | 0.00036                                                  | 0.00273                                              | 0.00308                                      | 0.00002                                                |
| 50000            | 0.00030                                                  | 0.00278                                              | 0.00306                                      | 0.00002                                                |
| 40000            | 0.00024                                                  | 0.00282                                              | 0.00304                                      | 0.00002                                                |
| 30000            | 0.00018                                                  | 0.00286                                              | 0.00302                                      | 0.00002                                                |
| 20000            | 0.00012                                                  | 0.00290                                              | 0.00300                                      | 0.00002                                                |
| 10000            | 0.00006                                                  | 0.00294                                              | 0.00298                                      | 0.00002                                                |
| 0                | 0.00000                                                  | 0.00298                                              | 0.00296                                      | 0.00002                                                |

**Table S8.** CO<sub>2</sub> supersaturations generated in water with 500 mbar (50000 Pa) step-down pressure and different waiting times (saturation pressure: 6000 mbar or 600000 Pa)

| Pressure<br>(Pa) | Supersaturation after each waiting time (mol/l) |         |         |         |
|------------------|-------------------------------------------------|---------|---------|---------|
|                  | 15 min                                          | 30 min  | 45 min  | 60 min  |
| 550000           | 0.01678                                         | 0.01678 | 0.01678 | 0.01678 |
| 500000           | 0.03350                                         | 0.03293 | 0.03206 | 0.03119 |
| 450000           | 0.05017                                         | 0.04848 | 0.04599 | 0.04358 |
| 400000           | 0.06679                                         | 0.06346 | 0.05868 | 0.05423 |
| 350000           | 0.08335                                         | 0.07787 | 0.07024 | 0.06337 |
| 300000           | 0.09986                                         | 0.09175 | 0.08077 | 0.07123 |
| 250000           | 0.11632                                         | 0.10511 | 0.09036 | 0.07799 |
| 200000           | 0.13272                                         | 0.11798 | 0.09910 | 0.08379 |
| 150000           | 0.14907                                         | 0.13037 | 0.10707 | 0.08878 |
| 100000           | 0.16537                                         | 0.14229 | 0.11432 | 0.09306 |
| 50000            | 0.18162                                         | 0.15377 | 0.12093 | 0.09675 |
| 0                | 0.19781                                         | 0.16483 | 0.12696 | 0.09991 |

**Table S9.** CO<sub>2</sub> supersaturations generated in water with 100 mbar (10000 Pa) step-down pressure and different waiting times (saturation pressure: 6000 mbar or 600000 Pa)

| Pressure<br>(Pa) | Supersaturation after each waiting time (mol/l) |         |         |         |
|------------------|-------------------------------------------------|---------|---------|---------|
|                  | 15 min                                          | 30 min  | 45 min  | 60 min  |
| 590000           | 0.00336                                         | 0.00336 | 0.00336 | 0.00336 |
| 580000           | 0.00670                                         | 0.00659 | 0.00641 | 0.00624 |
| 570000           | 0.01003                                         | 0.00970 | 0.00920 | 0.00872 |
| 560000           | 0.01336                                         | 0.01269 | 0.01174 | 0.01085 |
| 550000           | 0.01667                                         | 0.01557 | 0.01405 | 0.01267 |
| 540000           | 0.01997                                         | 0.01835 | 0.01615 | 0.01425 |
| 530000           | 0.02326                                         | 0.02102 | 0.01807 | 0.01560 |
| 520000           | 0.02654                                         | 0.02360 | 0.01982 | 0.01676 |
| 510000           | 0.02981                                         | 0.02607 | 0.02141 | 0.01776 |
| 500000           | 0.03307                                         | 0.02846 | 0.02286 | 0.01861 |
| 490000           | 0.03632                                         | 0.03075 | 0.02419 | 0.01935 |
| 480000           | 0.03956                                         | 0.03297 | 0.02539 | 0.01998 |
| 470000           | 0.04279                                         | 0.03509 | 0.02649 | 0.02053 |
| 460000           | 0.04601                                         | 0.03714 | 0.02749 | 0.02099 |
| 450000           | 0.04922                                         | 0.03912 | 0.02840 | 0.02139 |
| 440000           | 0.05241                                         | 0.04102 | 0.02923 | 0.02174 |
| 430000           | 0.05560                                         | 0.04284 | 0.02998 | 0.02204 |
| 420000           | 0.05878                                         | 0.04461 | 0.03067 | 0.02229 |



| Pressure<br>(Pa) | Supersaturation after each waiting time (mol/l) |         |         |         |
|------------------|-------------------------------------------------|---------|---------|---------|
|                  | 15 min                                          | 30 min  | 45 min  | 60 min  |
| 410000           | 0.06194                                         | 0.04630 | 0.03130 | 0.02251 |
| 400000           | 0.06510                                         | 0.04793 | 0.03187 | 0.02270 |
| 390000           | 0.06825                                         | 0.04950 | 0.03239 | 0.02286 |
| 380000           | 0.07138                                         | 0.05102 | 0.03287 | 0.02300 |
| 370000           | 0.07451                                         | 0.05247 | 0.03330 | 0.02312 |
| 360000           | 0.07762                                         | 0.05388 | 0.03369 | 0.02322 |
| 350000           | 0.08073                                         | 0.05523 | 0.03405 | 0.02331 |
| 340000           | 0.08383                                         | 0.05653 | 0.03438 | 0.02338 |
| 330000           | 0.08691                                         | 0.05778 | 0.03468 | 0.02345 |
| 320000           | 0.08999                                         | 0.05898 | 0.03495 | 0.02351 |
| 310000           | 0.09305                                         | 0.06014 | 0.03520 | 0.02355 |
| 300000           | 0.09611                                         | 0.06126 | 0.03542 | 0.02359 |
| 290000           | 0.09916                                         | 0.06234 | 0.03563 | 0.02363 |
| 280000           | 0.10219                                         | 0.06337 | 0.03581 | 0.02366 |
| 270000           | 0.10522                                         | 0.06437 | 0.03598 | 0.02369 |
| 260000           | 0.10824                                         | 0.06533 | 0.03614 | 0.02371 |
| 250000           | 0.11124                                         | 0.06625 | 0.03628 | 0.02373 |
| 240000           | 0.11424                                         | 0.06714 | 0.03641 | 0.02375 |
| 230000           | 0.11723                                         | 0.06800 | 0.03653 | 0.02376 |
| 220000           | 0.12021                                         | 0.06882 | 0.03663 | 0.02377 |

| Pressure<br>(Pa) | Supersaturation after each waiting time (mol/l) |         |         |         |
|------------------|-------------------------------------------------|---------|---------|---------|
|                  | 15 min                                          | 30 min  | 45 min  | 60 min  |
| 210000           | 0.12318                                         | 0.06962 | 0.03673 | 0.02378 |
| 200000           | 0.12614                                         | 0.07038 | 0.03682 | 0.02379 |
| 190000           | 0.12909                                         | 0.07112 | 0.03690 | 0.02380 |
| 180000           | 0.13203                                         | 0.07182 | 0.03697 | 0.02381 |
| 170000           | 0.13496                                         | 0.07251 | 0.03704 | 0.02381 |
| 160000           | 0.13788                                         | 0.07316 | 0.03710 | 0.02382 |
| 150000           | 0.14079                                         | 0.07380 | 0.03716 | 0.02382 |
| 140000           | 0.14369                                         | 0.07440 | 0.03721 | 0.02382 |
| 130000           | 0.14659                                         | 0.07499 | 0.03726 | 0.02383 |
| 120000           | 0.14947                                         | 0.07556 | 0.03730 | 0.02383 |
| 110000           | 0.15235                                         | 0.07610 | 0.03734 | 0.02383 |
| 100000           | 0.15521                                         | 0.07662 | 0.03737 | 0.02383 |
| 90000            | 0.15807                                         | 0.07713 | 0.03740 | 0.02384 |
| 80000            | 0.16092                                         | 0.07761 | 0.03743 | 0.02384 |
| 70000            | 0.16375                                         | 0.07808 | 0.03746 | 0.02384 |
| 60000            | 0.16658                                         | 0.07853 | 0.03748 | 0.02384 |
| 50000            | 0.16940                                         | 0.07896 | 0.03750 | 0.02384 |
| 40000            | 0.17221                                         | 0.07938 | 0.03752 | 0.02384 |
| 30000            | 0.17501                                         | 0.07978 | 0.03754 | 0.02384 |
| 20000            | 0.17781                                         | 0.08016 | 0.03756 | 0.02384 |

| Pressure<br>(Pa) | Supersaturation after each waiting time (mol/l) |         |         |         |
|------------------|-------------------------------------------------|---------|---------|---------|
|                  | 15 min                                          | 30 min  | 45 min  | 60 min  |
| 10000            | 0.18059                                         | 0.08053 | 0.03757 | 0.02384 |
| 0                | 0.18337                                         | 0.08089 | 0.03759 | 0.02384 |

**Table S10.** CH<sub>4</sub> supersaturations generated in water with 500 mbar (50000 Pa) step-down pressure and different waiting times (saturation pressure: 6000 mbar or 600000 Pa)

| Pressure<br>(Pa) | Supersaturation after each waiting time (mol/l) |         |         |         |
|------------------|-------------------------------------------------|---------|---------|---------|
|                  | 15 min                                          | 30 min  | 45 min  | 60 min  |
| 550000           | 0.00068                                         | 0.00068 | 0.00068 | 0.00068 |
| 500000           | 0.00136                                         | 0.00133 | 0.00129 | 0.00125 |
| 450000           | 0.00203                                         | 0.00195 | 0.00183 | 0.00173 |
| 400000           | 0.00270                                         | 0.00254 | 0.00232 | 0.00213 |
| 350000           | 0.00337                                         | 0.00310 | 0.00276 | 0.00247 |
| 300000           | 0.00403                                         | 0.00363 | 0.00315 | 0.00275 |
| 250000           | 0.00469                                         | 0.00414 | 0.00349 | 0.00299 |
| 200000           | 0.00535                                         | 0.00462 | 0.00381 | 0.00319 |
| 150000           | 0.00601                                         | 0.00508 | 0.00408 | 0.00335 |
| 100000           | 0.00666                                         | 0.00552 | 0.00433 | 0.00349 |
| 50000            | 0.00730                                         | 0.00594 | 0.00455 | 0.00361 |
| 0                | 0.00795                                         | 0.00634 | 0.00475 | 0.00371 |

**Table S11.** CH<sub>4</sub> supersaturations generated in water with 100 mbar (10000 Pa) step-down pressure and different waiting times (saturation pressure: 6000 mbar or 600000 Pa)

| Pressure<br>(Pa) | Supersaturation after each waiting time (mol/l) |         |         |         |
|------------------|-------------------------------------------------|---------|---------|---------|
|                  | 15 min                                          | 30 min  | 45 min  | 60 min  |
| 590000           | 0.00014                                         | 0.00014 | 0.00014 | 0.00014 |
| 580000           | 0.00027                                         | 0.00027 | 0.00026 | 0.00025 |
| 570000           | 0.00041                                         | 0.00039 | 0.00037 | 0.00035 |
| 560000           | 0.00054                                         | 0.00051 | 0.00046 | 0.00043 |
| 550000           | 0.00067                                         | 0.00062 | 0.00055 | 0.00049 |
| 540000           | 0.00081                                         | 0.00073 | 0.00063 | 0.00055 |
| 530000           | 0.00094                                         | 0.00083 | 0.00070 | 0.00060 |
| 520000           | 0.00107                                         | 0.00092 | 0.00076 | 0.00064 |
| 510000           | 0.00120                                         | 0.00102 | 0.00082 | 0.00067 |
| 500000           | 0.00133                                         | 0.00110 | 0.00087 | 0.00070 |
| 490000           | 0.00146                                         | 0.00119 | 0.00091 | 0.00072 |
| 480000           | 0.00159                                         | 0.00127 | 0.00095 | 0.00074 |
| 470000           | 0.00172                                         | 0.00134 | 0.00099 | 0.00076 |
| 460000           | 0.00184                                         | 0.00142 | 0.00102 | 0.00077 |
| 450000           | 0.00197                                         | 0.00148 | 0.00105 | 0.00078 |
| 440000           | 0.00210                                         | 0.00155 | 0.00107 | 0.00079 |
| 430000           | 0.00222                                         | 0.00161 | 0.00109 | 0.00080 |
| 420000           | 0.00235                                         | 0.00167 | 0.00112 | 0.00081 |

| Pressure<br>(Pa) | Supersaturation after each waiting time (mol/l) |         |         |         |
|------------------|-------------------------------------------------|---------|---------|---------|
|                  | 15 min                                          | 30 min  | 45 min  | 60 min  |
| 410000           | 0.00247                                         | 0.00173 | 0.00113 | 0.00081 |
| 400000           | 0.00260                                         | 0.00178 | 0.00115 | 0.00082 |
| 390000           | 0.00272                                         | 0.00183 | 0.00116 | 0.00082 |
| 380000           | 0.00284                                         | 0.00188 | 0.00118 | 0.00083 |
| 370000           | 0.00296                                         | 0.00193 | 0.00119 | 0.00083 |
| 360000           | 0.00308                                         | 0.00197 | 0.00120 | 0.00083 |
| 350000           | 0.00320                                         | 0.00202 | 0.00121 | 0.00083 |
| 340000           | 0.00332                                         | 0.00206 | 0.00122 | 0.00084 |
| 330000           | 0.00344                                         | 0.00209 | 0.00122 | 0.00084 |
| 320000           | 0.00356                                         | 0.00213 | 0.00123 | 0.00084 |
| 310000           | 0.00368                                         | 0.00217 | 0.00124 | 0.00084 |
| 300000           | 0.00380                                         | 0.00220 | 0.00124 | 0.00084 |
| 290000           | 0.00391                                         | 0.00223 | 0.00125 | 0.00084 |
| 280000           | 0.00403                                         | 0.00226 | 0.00125 | 0.00084 |
| 270000           | 0.00415                                         | 0.00229 | 0.00125 | 0.00084 |
| 260000           | 0.00426                                         | 0.00232 | 0.00126 | 0.00084 |
| 250000           | 0.00438                                         | 0.00234 | 0.00126 | 0.00084 |
| 240000           | 0.00449                                         | 0.00237 | 0.00126 | 0.00084 |
| 230000           | 0.00460                                         | 0.00239 | 0.00127 | 0.00084 |
| 220000           | 0.00472                                         | 0.00241 | 0.00127 | 0.00084 |

| Pressure<br>(Pa) | Supersaturation after each waiting time (mol/l) |         |         |         |
|------------------|-------------------------------------------------|---------|---------|---------|
|                  | 15 min                                          | 30 min  | 45 min  | 60 min  |
| 210000           | 0.00483                                         | 0.00243 | 0.00127 | 0.00084 |
| 200000           | 0.00494                                         | 0.00245 | 0.00127 | 0.00084 |
| 190000           | 0.00505                                         | 0.00247 | 0.00127 | 0.00084 |
| 180000           | 0.00516                                         | 0.00249 | 0.00128 | 0.00084 |
| 170000           | 0.00527                                         | 0.00251 | 0.00128 | 0.00084 |
| 160000           | 0.00538                                         | 0.00253 | 0.00128 | 0.00084 |
| 150000           | 0.00549                                         | 0.00254 | 0.00128 | 0.00084 |
| 140000           | 0.00560                                         | 0.00256 | 0.00128 | 0.00084 |
| 130000           | 0.00571                                         | 0.00257 | 0.00128 | 0.00084 |
| 120000           | 0.00581                                         | 0.00259 | 0.00128 | 0.00084 |
| 110000           | 0.00592                                         | 0.00260 | 0.00128 | 0.00084 |
| 100000           | 0.00603                                         | 0.00261 | 0.00128 | 0.00084 |
| 90000            | 0.00613                                         | 0.00262 | 0.00128 | 0.00084 |
| 80000            | 0.00624                                         | 0.00263 | 0.00128 | 0.00084 |
| 70000            | 0.00634                                         | 0.00264 | 0.00128 | 0.00084 |
| 60000            | 0.00644                                         | 0.00265 | 0.00128 | 0.00084 |
| 50000            | 0.00655                                         | 0.00266 | 0.00128 | 0.00084 |
| 40000            | 0.00665                                         | 0.00267 | 0.00128 | 0.00084 |
| 30000            | 0.00675                                         | 0.00268 | 0.00128 | 0.00084 |
| 20000            | 0.00685                                         | 0.00269 | 0.00129 | 0.00084 |

| Pressure<br>(Pa) | Supersaturation after each waiting time (mol/l) |         |         |         |
|------------------|-------------------------------------------------|---------|---------|---------|
|                  | 15 min                                          | 30 min  | 45 min  | 60 min  |
| 10000            | 0.00696                                         | 0.00270 | 0.00129 | 0.00084 |
| 0                | 0.00706                                         | 0.00271 | 0.00129 | 0.00084 |



**Table S12.** N<sub>2</sub> supersaturations generated in water with 500 mbar (50000 Pa) step-down pressure and different waiting times (saturation pressure: 6000 mbar or 600000 Pa)

| Pressure<br>(Pa) | Supersaturation after each waiting time (mol/l) |         |         |         |
|------------------|-------------------------------------------------|---------|---------|---------|
|                  | 15 min                                          | 30 min  | 45 min  | 60 min  |
| 550000           | 0.00030                                         | 0.00030 | 0.00030 | 0.00030 |
| 500000           | 0.00060                                         | 0.00059 | 0.00057 | 0.00055 |
| 450000           | 0.00090                                         | 0.00085 | 0.00080 | 0.00075 |
| 400000           | 0.00119                                         | 0.00111 | 0.00101 | 0.00092 |
| 350000           | 0.00148                                         | 0.00135 | 0.00119 | 0.00106 |
| 300000           | 0.00178                                         | 0.00157 | 0.00135 | 0.00118 |
| 250000           | 0.00207                                         | 0.00179 | 0.00149 | 0.00127 |
| 200000           | 0.00235                                         | 0.00199 | 0.00162 | 0.00135 |
| 150000           | 0.00264                                         | 0.00218 | 0.00173 | 0.00141 |
| 100000           | 0.00292                                         | 0.00236 | 0.00183 | 0.00147 |
| 50000            | 0.00320                                         | 0.00253 | 0.00191 | 0.00151 |
| 0                | 0.00348                                         | 0.00269 | 0.00199 | 0.00155 |

**Table S13.** N<sub>2</sub> supersaturations generated in water with 100 mbar (10000 Pa) step-down pressure and different waiting times (saturation pressure: 6000 mbar or 600000 Pa)

| Pressure<br>(Pa) | Supersaturation after each waiting time (mol/l) |         |         |         |
|------------------|-------------------------------------------------|---------|---------|---------|
|                  | 15 min                                          | 30 min  | 45 min  | 60 min  |
| 590000           | 0.00006                                         | 0.00006 | 0.00006 | 0.00006 |
| 580000           | 0.00012                                         | 0.00012 | 0.00011 | 0.00011 |
| 570000           | 0.00018                                         | 0.00017 | 0.00016 | 0.00015 |
| 560000           | 0.00024                                         | 0.00022 | 0.00020 | 0.00018 |
| 550000           | 0.00030                                         | 0.00027 | 0.00024 | 0.00021 |
| 540000           | 0.00036                                         | 0.00031 | 0.00027 | 0.00024 |
| 530000           | 0.00041                                         | 0.00036 | 0.00030 | 0.00025 |
| 520000           | 0.00047                                         | 0.00040 | 0.00032 | 0.00027 |
| 510000           | 0.00053                                         | 0.00044 | 0.00035 | 0.00028 |
| 500000           | 0.00058                                         | 0.00047 | 0.00037 | 0.00029 |
| 490000           | 0.00064                                         | 0.00051 | 0.00038 | 0.00030 |
| 480000           | 0.00070                                         | 0.00054 | 0.00040 | 0.00031 |
| 470000           | 0.00075                                         | 0.00057 | 0.00041 | 0.00032 |
| 460000           | 0.00081                                         | 0.00060 | 0.00042 | 0.00032 |
| 450000           | 0.00086                                         | 0.00063 | 0.00043 | 0.00032 |
| 440000           | 0.00092                                         | 0.00065 | 0.00044 | 0.00033 |
| 430000           | 0.00097                                         | 0.00067 | 0.00045 | 0.00033 |
| 420000           | 0.00102                                         | 0.00070 | 0.00046 | 0.00033 |

| Pressure<br>(Pa) | Supersaturation after each waiting time (mol/l) |         |         |         |
|------------------|-------------------------------------------------|---------|---------|---------|
|                  | 15 min                                          | 30 min  | 45 min  | 60 min  |
| 410000           | 0.00108                                         | 0.00072 | 0.00046 | 0.00033 |
| 400000           | 0.00113                                         | 0.00074 | 0.00047 | 0.00034 |
| 390000           | 0.00118                                         | 0.00076 | 0.00048 | 0.00034 |
| 380000           | 0.00124                                         | 0.00078 | 0.00048 | 0.00034 |
| 370000           | 0.00129                                         | 0.00079 | 0.00048 | 0.00034 |
| 360000           | 0.00134                                         | 0.00081 | 0.00049 | 0.00034 |
| 350000           | 0.00139                                         | 0.00083 | 0.00049 | 0.00034 |
| 340000           | 0.00144                                         | 0.00084 | 0.00049 | 0.00034 |
| 330000           | 0.00149                                         | 0.00085 | 0.00049 | 0.00034 |
| 320000           | 0.00154                                         | 0.00087 | 0.00050 | 0.00034 |
| 310000           | 0.00159                                         | 0.00088 | 0.00050 | 0.00034 |
| 300000           | 0.00164                                         | 0.00089 | 0.00050 | 0.00034 |
| 290000           | 0.00169                                         | 0.00090 | 0.00050 | 0.00034 |
| 280000           | 0.00174                                         | 0.00091 | 0.00050 | 0.00034 |
| 270000           | 0.00179                                         | 0.00092 | 0.00050 | 0.00034 |
| 260000           | 0.00184                                         | 0.00093 | 0.00050 | 0.00034 |
| 250000           | 0.00188                                         | 0.00094 | 0.00051 | 0.00034 |
| 240000           | 0.00193                                         | 0.00095 | 0.00051 | 0.00034 |
| 230000           | 0.00198                                         | 0.00096 | 0.00051 | 0.00034 |
| 220000           | 0.00203                                         | 0.00096 | 0.00051 | 0.00034 |

| Pressure<br>(Pa) | Supersaturation after each waiting time (mol/l) |         |         |         |
|------------------|-------------------------------------------------|---------|---------|---------|
|                  | 15 min                                          | 30 min  | 45 min  | 60 min  |
| 210000           | 0.00207                                         | 0.00097 | 0.00051 | 0.00034 |
| 200000           | 0.00212                                         | 0.00098 | 0.00051 | 0.00034 |
| 190000           | 0.00216                                         | 0.00098 | 0.00051 | 0.00034 |
| 180000           | 0.00221                                         | 0.00099 | 0.00051 | 0.00034 |
| 170000           | 0.00226                                         | 0.00099 | 0.00051 | 0.00034 |
| 160000           | 0.00230                                         | 0.00100 | 0.00051 | 0.00034 |
| 150000           | 0.00235                                         | 0.00101 | 0.00051 | 0.00034 |
| 140000           | 0.00239                                         | 0.00101 | 0.00051 | 0.00034 |
| 130000           | 0.00243                                         | 0.00101 | 0.00051 | 0.00034 |
| 120000           | 0.00248                                         | 0.00102 | 0.00051 | 0.00034 |
| 110000           | 0.00252                                         | 0.00102 | 0.00051 | 0.00034 |
| 100000           | 0.00256                                         | 0.00103 | 0.00051 | 0.00034 |
| 90000            | 0.00261                                         | 0.00103 | 0.00051 | 0.00034 |
| 80000            | 0.00265                                         | 0.00103 | 0.00051 | 0.00034 |
| 70000            | 0.00269                                         | 0.00104 | 0.00051 | 0.00034 |
| 60000            | 0.00273                                         | 0.00104 | 0.00051 | 0.00034 |
| 50000            | 0.00278                                         | 0.00104 | 0.00051 | 0.00034 |
| 40000            | 0.00282                                         | 0.00104 | 0.00051 | 0.00034 |
| 30000            | 0.00286                                         | 0.00105 | 0.00051 | 0.00034 |
| 20000            | 0.00290                                         | 0.00105 | 0.00051 | 0.00034 |

| Pressure<br>(Pa) | Supersaturation after each waiting time (mol/l) |         |         |         |
|------------------|-------------------------------------------------|---------|---------|---------|
|                  | 15 min                                          | 30 min  | 45 min  | 60 min  |
| 10000            | 0.00294                                         | 0.00105 | 0.00051 | 0.00034 |
| 0                | 0.00298                                         | 0.00105 | 0.00051 | 0.00034 |
